# Supplementary material for: A formally exact theory to construct nonreactive forcefields using linear regression to optimize bonded parameters
Source: Royal Society of Chemistry journal article supplement (doi:10.1039/d4ra01861c), 2024-01-01
Supplement: d4ra01861c1.pdf [file d4ra01861c1.pdf]

**Electronic Supplementary Information for**  
**A Formally Exact Theory to Construct Nonreactive Forcefields using Linear Regression to Optimize Bonded Parameters**

Thomas A. Manz

Chemical & Materials Engineering, New Mexico State University, Las Cruces, NM 88001

Email: tmanz@nmsu.edu

**Contents**

- [1. Supplementary tables](#)
- [2. Analytic derivatives of the damped nonbonded potential](#)
- [3. Analytic derivatives of the Manz stretch potential](#)
- [4. Analytic derivatives of my new angle-bending potential](#)

### S1. Supplementary tables

Table S1: Comparison of quantum-mechanically-computed Born-Oppenheimer energies (FCI/aug-cc-pVQZ) to those of the fitted forcefield for the H<sub>2</sub> singlet molecule. Results are shown for different values of the LASSO regularization parameter  $\lambda$ . The last row shows the root-mean-squared error (RMSE) in hartree. Please see Section 2.6.1 of the main text for additional details and discussion.

| length<br>(pm) | $E_{\text{singlet}}$<br>(hartree) | $E_{\text{triplet}}$<br>(hartree) | $U^{\text{FF}}-E_{\text{singlet}}$<br>( $\lambda=10^{-8}$ ) | $U^{\text{FF}}-E_{\text{singlet}}$<br>( $\lambda=10^{-9}$ ) | $U^{\text{FF}}-E_{\text{singlet}}$<br>( $\lambda=10^{-10}$ ) | $U^{\text{FF}}-E_{\text{singlet}}$<br>( $\lambda=10^{-11}$ ) | $U^{\text{FF}}-E_{\text{singlet}}$<br>( $\lambda=10^{-12}$ ) | $U^{\text{FF}}-E_{\text{singlet}}$<br>( $\lambda=10^{-20}$ ) |
|----------------|-----------------------------------|-----------------------------------|-------------------------------------------------------------|-------------------------------------------------------------|--------------------------------------------------------------|--------------------------------------------------------------|--------------------------------------------------------------|--------------------------------------------------------------|
| 50             | -1.10342                          | -0.57329                          | -0.00003                                                    | -0.00001                                                    | 0.00000                                                      | 0.00000                                                      | 0.00000                                                      | 0.00000                                                      |
| 60             | -1.15536                          | -0.69147                          | 0.00015                                                     | 0.00008                                                     | 0.00002                                                      | -0.00001                                                     | -0.00002                                                     | 0.00000                                                      |
| 70             | -1.17259                          | -0.76151                          | 0.00000                                                     | 0.00001                                                     | 0.00001                                                      | 0.00001                                                      | 0.00001                                                      | -0.00002                                                     |
| 74.199         | -1.17387                          | -0.78459                          | 0.00000                                                     | 0.00000                                                     | 0.00000                                                      | 0.00000                                                      | 0.00000                                                      | 0.00000                                                      |
| 80             | -1.17190                          | -0.81221                          | -0.00002                                                    | 0.00001                                                     | 0.00001                                                      | 0.00002                                                      | 0.00002                                                      | -0.00002                                                     |
| 90             | -1.16189                          | -0.85111                          | -0.00017                                                    | 0.00001                                                     | 0.00003                                                      | 0.00006                                                      | 0.00007                                                      | 0.00000                                                      |
| 100            | -1.14725                          | -0.88188                          | -0.00029                                                    | -0.00007                                                    | -0.00002                                                     | 0.00002                                                      | 0.00003                                                      | 0.00005                                                      |
| 125            | -1.10531                          | -0.93467                          | 0.00008                                                     | -0.00007                                                    | -0.00005                                                     | -0.00008                                                     | -0.00009                                                     | -0.00004                                                     |
| 150            | -1.06790                          | -0.96483                          | 0.00036                                                     | 0.00015                                                     | 0.00010                                                      | 0.00009                                                      | 0.00008                                                      | 0.00002                                                      |
| 175            | -1.04010                          | -0.98161                          | -0.00001                                                    | 0.00004                                                     | 0.00002                                                      | 0.00004                                                      | 0.00005                                                      | 0.00005                                                      |
| 200            | -1.02193                          | -0.99066                          | -0.00034                                                    | -0.00014                                                    | -0.00010                                                     | -0.00009                                                     | -0.00008                                                     | -0.00004                                                     |
| 225            | -1.01130                          | -0.99539                          | -0.00027                                                    | -0.00010                                                    | -0.00006                                                     | -0.00006                                                     | -0.00006                                                     | -0.00005                                                     |
| 250            | -1.00558                          | -0.99779                          | 0.00002                                                     | 0.00003                                                     | 0.00005                                                      | 0.00004                                                      | 0.00003                                                      | 0.00001                                                      |
| 275            | -1.00268                          | -0.99896                          | 0.00025                                                     | 0.00011                                                     | 0.00009                                                      | 0.00008                                                      | 0.00007                                                      | 0.00004                                                      |
| 300            | -1.00125                          | -0.99951                          | 0.00029                                                     | 0.00008                                                     | 0.00003                                                      | 0.00003                                                      | 0.00004                                                      | 0.00003                                                      |
| 350            | -1.00023                          | -0.99986                          | 0.00001                                                     | -0.00008                                                    | -0.00011                                                     | -0.00009                                                     | -0.00008                                                     | -0.00004                                                     |
| 400            | -0.99999                          | -0.99991                          | -0.00025                                                    | -0.00008                                                    | -0.00005                                                     | -0.00005                                                     | -0.00005                                                     | -0.00004                                                     |
| 450            | -0.99998                          | -0.99991                          | -0.00014                                                    | 0.00008                                                     | 0.00013                                                      | 0.00011                                                      | 0.00010                                                      | 0.00006                                                      |
| 500            | -0.99991                          | -0.99991                          | 0.00017                                                     | -0.00002                                                    | -0.00005                                                     | -0.00005                                                     | -0.00004                                                     | -0.00002                                                     |
| RMSE           | —                                 | —                                 | 2.0E-04                                                     | 7.6E-05                                                     | 6.3E-05                                                      | 5.9E-05                                                      | 5.8E-05                                                      | 3.4E-05                                                      |

Table S2: Computed force constants representing the H<sub>2</sub> electronic singlet state's bonded interaction energy. Results are shown for different values of the LASSO regularization parameter  $\lambda$ . The last row shows the sum of absolute values of the force constants. Please see Section 2.6.1 of the main text for additional details and discussion.

|                 | $\lambda=10^{-8}$ | $\lambda=10^{-9}$ | $\lambda=10^{-10}$ | $\lambda=10^{-11}$ | $\lambda=10^{-12}$ | $\lambda=10^{-20}$ |
|-----------------|-------------------|-------------------|--------------------|--------------------|--------------------|--------------------|
| k <sub>1</sub>  | 0.722095562       | 0.732963059       | 0.731056623        | 0.732239879        | 0.732721173        | 0.716352037        |
| k <sub>2</sub>  | -0.493924304      | -0.453665595      | -0.437217721       | -0.425469207       | -0.422810820       | -0.401964886       |
| k <sub>3</sub>  | 0.423826705       | 0.172199834       | 0.203826522        | 0.164324310        | 0.152145226        | 0.620093926        |
| k <sub>4</sub>  | 0.000000000       | -0.220855956      | -0.436476147       | -0.552373758       | -0.576139531       | -1.588700146       |
| k <sub>5</sub>  | 0.000000000       | 1.547859193       | 1.439235648        | 1.755529569        | 1.830273684        | -0.723790820       |
| k <sub>6</sub>  | -1.370826079      | -2.221089984      | -1.326968080       | -1.099867066       | -1.070479469       | 6.738112940        |
| k <sub>7</sub>  | 0.000000000       | -0.659979520      | -0.700716437       | -1.128691139       | -1.116208404       | -3.372565479       |
| k <sub>8</sub>  | 0.000000000       | 0.000000000       | -1.068785502       | -1.502396056       | -1.627598580       | -4.246902958       |
| k <sub>9</sub>  | 0.000000000       | 0.000000000       | 0.000000000        | -0.249227598       | -0.529246504       | -5.135999922       |
| k <sub>10</sub> | 0.000000000       | 0.000000000       | 0.000000000        | 0.383964516        | 0.554896362        | -0.243272935       |
| k <sub>11</sub> | 1.404363463       | 0.000000000       | 0.992454504        | 1.802334706        | 1.728244142        | 4.554823776        |
| k <sub>12</sub> | 0.158317729       | 2.789790589       | 1.532480608        | 1.860919841        | 2.130693142        | 7.914267812        |
| k <sub>13</sub> | 0.000000000       | 0.000000000       | 1.120819449        | 0.963001977        | 1.684902249        | 6.919472380        |
| k <sub>14</sub> | 0.000000000       | 0.000000000       | 0.000000000        | 0.000000000        | 0.392860928        | 1.508486184        |
| k <sub>15</sub> | 0.000000000       | 0.000000000       | 0.000000000        | -0.013939077       | -1.083956753       | -6.637173720       |
| k <sub>16</sub> | 0.000000000       | 0.000000000       | 0.000000000        | -1.585807685       | -2.432520787       | -12.808342789      |
| k <sub>17</sub> | 0.000000000       | 0.000000000       | 0.000000000        | -1.349541481       | -2.005604045       | -9.225503143       |
| k <sub>18</sub> | -0.754863080      | -1.915303544      | -2.374382200       | 0.007312916        | 1.475379887        | 15.592033023       |
| abs sum         | 5.32821692        | 10.71370727       | 12.36441944        | 15.57694078        | 21.54668169        | 88.94785887        |

## S2. Analytic derivatives of the damped nonbonded potential

When evaluating derivatives for Cases #1, #2, and #3 described below, the following derivatives of the separation functions are useful:

$$\tau_{AB} \left[ d_{AB}, d_{\text{cutoff}}^{\text{nonbonded}} \right] = \tanh \left[ \frac{d_{\text{cutoff}}^{\text{nonbonded}}}{d_{AB}} - \frac{d_{AB}}{d_{\text{cutoff}}^{\text{nonbonded}}} \right] \quad (\text{S1})$$

$$\tau_{AB} \left[ d_{AB}, d_{AB}^{\text{eq},j} \right] = \tanh \left[ \frac{d_{AB}^{\text{eq},j}}{d_{AB}} - \frac{d_{AB}}{d_{AB}^{\text{eq},j}} \right] \quad (\text{S2})$$

$$\vec{\nabla}_{C \notin \{A,B\}} \tau_{AB} \left[ d_{AB}, d_{\text{cutoff}}^{\text{nonbonded}} \right] = 0 \quad (\text{S3})$$

$$\vec{\nabla}_{C \notin \{A,B\}} \tau_{AB} \left[ d_{AB}, d_{AB}^{\text{eq},j} \right] = 0 \quad (\text{S4})$$

$$\vec{\nabla}_{\text{atom}_1} \vec{\nabla}_{C \notin \{A,B\}} \tau_{AB} \left[ d_{AB}, d_{\text{cutoff}}^{\text{nonbonded}} \right] = 0 \quad \text{for any atom}_1 \quad (\text{S5})$$

$$\vec{\nabla}_{C \notin \{A,B\}} \vec{\nabla}_{\text{atom}_2} \tau_{AB} \left[ d_{AB}, d_{\text{cutoff}}^{\text{nonbonded}} \right] = 0 \quad \text{for any atom}_2 \quad (\text{S6})$$

$$\vec{\nabla}_{\text{atom}_1} \vec{\nabla}_{C \notin \{A,B\}} \tau_{AB} \left[ d_{AB}, d_{AB}^{\text{eq},j} \right] = 0 \quad \text{for any atom}_1 \quad (\text{S7})$$

$$\vec{\nabla}_{C \notin \{A,B\}} \vec{\nabla}_{\text{atom}_2} \tau_{AB} \left[ d_{AB}, d_{AB}^{\text{eq},j} \right] = 0 \quad \text{for any atom}_2 \quad (\text{S8})$$

$$\vec{\nabla}_A \tau_{AB} \left[ d_{AB}, d_{\text{cutoff}}^{\text{nonbonded}} \right] = \left( \frac{d_{\text{cutoff}}^{\text{nonbonded}}}{d_{AB}^2} + \frac{1}{d_{\text{cutoff}}^{\text{nonbonded}}} \right) \left( 1 - \tanh^2 \left[ \frac{d_{\text{cutoff}}^{\text{nonbonded}}}{d_{AB}} - \frac{d_{AB}}{d_{\text{cutoff}}^{\text{nonbonded}}} \right] \right) \hat{R}_{AB} \quad (\text{S9})$$

$$\hat{R}_{AB} = (\vec{R}_B - \vec{R}_A) / d_{AB} \quad (\text{S10})$$

$$\vec{\nabla}_B \tau_{AB} \left[ d_{AB}, d_{\text{cutoff}}^{\text{nonbonded}} \right] = -\vec{\nabla}_A \tau_{AB} \left[ d_{AB}, d_{\text{cutoff}}^{\text{nonbonded}} \right] \quad (\text{S11})$$

$$\vec{\nabla}_A \tau_{AB} \left[ d_{AB}, d_{AB}^{\text{eq},j} \right] = \left( \frac{d_{AB}^{\text{eq},j}}{d_{AB}^2} + \frac{1}{d_{AB}^{\text{eq},j}} \right) \left( 1 - \tanh^2 \left[ \frac{d_{AB}^{\text{eq},j}}{d_{AB}} - \frac{d_{AB}}{d_{AB}^{\text{eq},j}} \right] \right) \hat{R}_{AB} \quad (\text{S12})$$

$$\vec{\nabla}_B \tau_{AB} \left[ d_{AB}, d_{AB}^{\text{eq},j} \right] = -\vec{\nabla}_A \tau_{AB} \left[ d_{AB}, d_{AB}^{\text{eq},j} \right] \quad (\text{S13})$$

$$\vec{\nabla}_A \vec{\nabla}_A \tau_{AB} \left[ d_{AB}, d_{\text{cutoff}}^{\text{nonbonded}} \right] = \vec{\nabla}_B \vec{\nabla}_B \tau_{AB} \left[ d_{AB}, d_{\text{cutoff}}^{\text{nonbonded}} \right] = \left( \begin{array}{l} \left( 3 \frac{d_{\text{cutoff}}^{\text{nonbonded}}}{d_{AB}^3} + \frac{1}{d_{\text{cutoff}}^{\text{nonbonded}} d_{AB}} \right) \left( 1 - \tanh^2 \left[ \frac{d_{\text{cutoff}}^{\text{nonbonded}}}{d_{AB}} - \frac{d_{AB}}{d_{\text{cutoff}}^{\text{nonbonded}}} \right] \right) \hat{R}_{AB} \hat{R}_{AB} \\ - 2 \left( \frac{d_{\text{cutoff}}^{\text{nonbonded}}}{d_{AB}^2} + \frac{1}{d_{\text{cutoff}}^{\text{nonbonded}}} \right)^2 \tanh \left[ \frac{d_{\text{cutoff}}^{\text{nonbonded}}}{d_{AB}} - \frac{d_{AB}}{d_{\text{cutoff}}^{\text{nonbonded}}} \right] \left( 1 - \tanh^2 \left[ \frac{d_{\text{cutoff}}^{\text{nonbonded}}}{d_{AB}} - \frac{d_{AB}}{d_{\text{cutoff}}^{\text{nonbonded}}} \right] \right) \hat{R}_{AB} \hat{R}_{AB} \\ - \frac{1}{d_{AB}} \left( \frac{d_{\text{cutoff}}^{\text{nonbonded}}}{d_{AB}^2} + \frac{1}{d_{\text{cutoff}}^{\text{nonbonded}}} \right) \left( 1 - \tanh^2 \left[ \frac{d_{\text{cutoff}}^{\text{nonbonded}}}{d_{AB}} - \frac{d_{AB}}{d_{\text{cutoff}}^{\text{nonbonded}}} \right] \right) \vec{\delta} \end{array} \right) \quad (\text{S14})$$

where  $\vec{\delta}$  is the  $3 \times 3$  identity tensor.

$$\vec{\nabla}_A \vec{\nabla}_B \tau_{AB} \left[ d_{AB}, d_{\text{cutoff}}^{\text{nonbonded}} \right] = \vec{\nabla}_B \vec{\nabla}_A \tau_{AB} \left[ d_{AB}, d_{\text{cutoff}}^{\text{nonbonded}} \right] = -\vec{\nabla}_A \vec{\nabla}_A \tau_{AB} \left[ d_{AB}, d_{\text{cutoff}}^{\text{nonbonded}} \right] \quad (\text{S15})$$

$$\begin{aligned} \vec{\nabla}_A \vec{\nabla}_A \tau_{AB} [d_{AB}, d_{AB}^{\text{eq},j}] &= \vec{\nabla}_B \vec{\nabla}_B \tau_{AB} [d_{AB}, d_{AB}^{\text{eq},j}] = \\ & \left( \begin{aligned} & \left( 3 \frac{d_{AB}^{\text{eq},j}}{d_{AB}^3} + \frac{1}{d_{AB}^{\text{eq},j} d_{AB}} \right) \left( 1 - \tanh^2 \left[ \frac{d_{AB}^{\text{eq},j}}{d_{AB}} - \frac{d_{AB}}{d_{AB}^{\text{eq},j}} \right] \right) \hat{\mathbf{R}}_{AB} \hat{\mathbf{R}}_{AB} \\ & - 2 \left( \frac{d_{AB}^{\text{eq},j}}{d_{AB}^2} + \frac{1}{d_{AB}^{\text{eq},j}} \right)^2 \tanh \left[ \frac{d_{AB}^{\text{eq},j}}{d_{AB}} - \frac{d_{AB}}{d_{AB}^{\text{eq},j}} \right] \left( 1 - \tanh^2 \left[ \frac{d_{AB}^{\text{eq},j}}{d_{AB}} - \frac{d_{AB}}{d_{AB}^{\text{eq},j}} \right] \right) \hat{\mathbf{R}}_{AB} \hat{\mathbf{R}}_{AB} \\ & - \frac{1}{d_{AB}} \left( \frac{d_{AB}^{\text{eq},j}}{d_{AB}^2} + \frac{1}{d_{AB}^{\text{eq},j}} \right) \left( 1 - \tanh^2 \left[ \frac{d_{AB}^{\text{eq},j}}{d_{AB}} - \frac{d_{AB}}{d_{AB}^{\text{eq},j}} \right] \right) \vec{\delta} \end{aligned} \right) \end{aligned} \quad (\text{S16})$$

$$\vec{\nabla}_A \vec{\nabla}_B \tau_{AB} [d_{AB}, d_{AB}^{\text{eq},j}] = \vec{\nabla}_B \vec{\nabla}_A \tau_{AB} [d_{AB}, d_{AB}^{\text{eq},j}] = -\vec{\nabla}_A \vec{\nabla}_A \tau_{AB} [d_{AB}, d_{AB}^{\text{eq},j}] \quad (\text{S17})$$

**In the below formulas, atom\_1 is any chosen atom in the material, and atom\_2 is any chosen atom in the material. Note: atom\_2 may either be the same atom or a different atom than atom\_1.**

*Case #1:* The two atoms A and B are inside the same bonded cluster j and a cutoff distance is used for their nonbonded interaction. In this case, we express the effective multibody pairwise potentials as follows:

$$\Phi_{ABx}^{\text{intercluster}} = \Theta_H [d_{\text{cutoff}}^{\text{nonbonded}} - d_{AB}] \tau_{AB}^3 [d_{AB}, d_{\text{cutoff}}^{\text{nonbonded}}] \tau_{AB}^2 [d_{AB}, d_{AB}^{\text{eq},j}] \left( U_{ABx, \text{intercluster}}^{\text{nonbonded}} [\{\vec{\mathbf{R}}_C\}] - U_{ABx, \text{intercluster}}^{\text{nonbonded}} [\{\vec{\mathbf{R}}_C^{\text{eq},j}\}] \right) \quad (\text{S18})$$

$$\Phi_{ABx}^{\text{intracluster}} = \Theta_H [d_{\text{cutoff}}^{\text{nonbonded}} - d_{AB}] \tau_{AB}^3 [d_{AB}, d_{\text{cutoff}}^{\text{nonbonded}}] \tau_{AB}^2 [d_{AB}, d_{AB}^{\text{eq},j}] \left( U_{ABx, \text{intracluster}}^{\text{nonbonded}} [\{\vec{\mathbf{R}}_C\}] - U_{ABx, \text{intracluster}}^{\text{nonbonded}} [\{\vec{\mathbf{R}}_C^{\text{eq},j}\}] \right) \quad (\text{S19})$$

$\Theta_H$  is the Heaviside step function, and  $d_{AB}^{\text{eq},j}$  is the equilibrium distance between atoms A and B in the isolated bonded cluster j. The first-order and second-order derivatives expand as follows:

$$\begin{aligned} \vec{\nabla}_{\text{atom}_1} \Phi_{ABx}^{\text{intercluster}} &= \Theta_H [d_{\text{cutoff}}^{\text{nonbonded}} - d_{AB}] \\ & \left( \begin{aligned} & 3\tau_{AB}^2 [d_{AB}, d_{\text{cutoff}}^{\text{nonbonded}}] \tau_{AB}^2 [d_{AB}, d_{AB}^{\text{eq},j}] \left( U_{ABx, \text{intercluster}}^{\text{nonbonded}} [\{\vec{\mathbf{R}}_C\}] - U_{ABx, \text{intercluster}}^{\text{nonbonded}} [\{\vec{\mathbf{R}}_C^{\text{eq},j}\}] \right) \vec{\nabla}_{\text{atom}_1} \tau_{AB} [d_{AB}, d_{\text{cutoff}}^{\text{nonbonded}}] \\ & + 2\tau_{AB}^3 [d_{AB}, d_{\text{cutoff}}^{\text{nonbonded}}] \tau_{AB} [d_{AB}, d_{AB}^{\text{eq},j}] \left( U_{ABx, \text{intercluster}}^{\text{nonbonded}} [\{\vec{\mathbf{R}}_C\}] - U_{ABx, \text{intercluster}}^{\text{nonbonded}} [\{\vec{\mathbf{R}}_C^{\text{eq},j}\}] \right) \vec{\nabla}_{\text{atom}_1} \tau_{AB} [d_{AB}, d_{AB}^{\text{eq},j}] \\ & + \tau_{AB}^3 [d_{AB}, d_{\text{cutoff}}^{\text{nonbonded}}] \tau_{AB}^2 [d_{AB}, d_{AB}^{\text{eq},j}] \vec{\nabla}_{\text{atom}_1} U_{ABx, \text{intercluster}}^{\text{nonbonded}} [\{\vec{\mathbf{R}}_C\}] \end{aligned} \right) \end{aligned} \quad (\text{S20})$$

$$\begin{aligned} \vec{\nabla}_{\text{atom}_1} \Phi_{ABx}^{\text{intracluster}} &= \Theta_H [d_{\text{cutoff}}^{\text{nonbonded}} - d_{AB}] \\ & \left( \begin{aligned} & 3\tau_{AB}^2 [d_{AB}, d_{\text{cutoff}}^{\text{nonbonded}}] \tau_{AB}^2 [d_{AB}, d_{AB}^{\text{eq},j}] \left( U_{ABx, \text{intracluster}}^{\text{nonbonded}} [\{\vec{\mathbf{R}}_C\}] - U_{ABx, \text{intracluster}}^{\text{nonbonded}} [\{\vec{\mathbf{R}}_C^{\text{eq},j}\}] \right) \vec{\nabla}_{\text{atom}_1} \tau_{AB} [d_{AB}, d_{\text{cutoff}}^{\text{nonbonded}}] \\ & + 2\tau_{AB}^3 [d_{AB}, d_{\text{cutoff}}^{\text{nonbonded}}] \tau_{AB} [d_{AB}, d_{AB}^{\text{eq},j}] \left( U_{ABx, \text{intracluster}}^{\text{nonbonded}} [\{\vec{\mathbf{R}}_C\}] - U_{ABx, \text{intracluster}}^{\text{nonbonded}} [\{\vec{\mathbf{R}}_C^{\text{eq},j}\}] \right) \vec{\nabla}_{\text{atom}_1} \tau_{AB} [d_{AB}, d_{AB}^{\text{eq},j}] \\ & + \tau_{AB}^3 [d_{AB}, d_{\text{cutoff}}^{\text{nonbonded}}] \tau_{AB}^2 [d_{AB}, d_{AB}^{\text{eq},j}] \vec{\nabla}_{\text{atom}_1} U_{ABx, \text{intracluster}}^{\text{nonbonded}} [\{\vec{\mathbf{R}}_C\}] \end{aligned} \right) \end{aligned} \quad (\text{S21})$$



*Case #2:* The two atoms A and B are inside the same bonded cluster  $j$  and a cutoff distance is not used for their nonbonded interaction. In this case, we express the effective multibody pairwise potentials as follows:

$$\Phi_{ABx}^{\text{intercluster}} = \tau_{AB}^2 [d_{AB}, d_{AB}^{\text{eq},j}] \left( U_{ABx,\text{intercluster}}^{\text{nonbonded}} [\{\bar{\mathbf{R}}_C\}] - U_{ABx,\text{intercluster}}^{\text{nonbonded}} [\{\bar{\mathbf{R}}_C^{\text{eq},j}\}] \right) \quad (\text{S24})$$

$$\Phi_{ABx}^{\text{intracluster}} = \tau_{AB}^2 [d_{AB}, d_{AB}^{\text{eq},j}] \left( U_{ABx,\text{intracluster}}^{\text{nonbonded}} [\{\bar{\mathbf{R}}_C\}] - U_{ABx,\text{intracluster}}^{\text{nonbonded}} [\{\bar{\mathbf{R}}_C^{\text{eq},j}\}] \right) \quad (\text{S25})$$

The first-order and second-order derivatives expand as follows:

$$\begin{aligned} \vec{\nabla}_{\text{atom}_1} \Phi_{ABx}^{\text{intercluster}} &= \Theta_H [d_{\text{cutoff}}^{\text{nonbonded}} - d_{AB}] \\ &\left( 2\tau_{AB} [d_{AB}, d_{AB}^{\text{eq},j}] \left( U_{ABx,\text{intercluster}}^{\text{nonbonded}} [\{\bar{\mathbf{R}}_C\}] - U_{ABx,\text{intercluster}}^{\text{nonbonded}} [\{\bar{\mathbf{R}}_C^{\text{eq},j}\}] \right) \vec{\nabla}_{\text{atom}_1} \tau_{AB} [d_{AB}, d_{AB}^{\text{eq},j}] \right. \\ &\left. + \tau_{AB}^2 [d_{AB}, d_{AB}^{\text{eq},j}] \vec{\nabla}_{\text{atom}_1} U_{ABx,\text{intercluster}}^{\text{nonbonded}} [\{\bar{\mathbf{R}}_C\}] \right) \end{aligned} \quad (\text{S26})$$

$$\begin{aligned} \vec{\nabla}_{\text{atom}_1} \Phi_{ABx}^{\text{intracluster}} &= \Theta_H [d_{\text{cutoff}}^{\text{nonbonded}} - d_{AB}] \\ &\left( 2\tau_{AB} [d_{AB}, d_{AB}^{\text{eq},j}] \left( U_{ABx,\text{intracluster}}^{\text{nonbonded}} [\{\bar{\mathbf{R}}_C\}] - U_{ABx,\text{intracluster}}^{\text{nonbonded}} [\{\bar{\mathbf{R}}_C^{\text{eq},j}\}] \right) \vec{\nabla}_{\text{atom}_1} \tau_{AB} [d_{AB}, d_{AB}^{\text{eq},j}] \right. \\ &\left. + \tau_{AB}^2 [d_{AB}, d_{AB}^{\text{eq},j}] \vec{\nabla}_{\text{atom}_1} U_{ABx,\text{intracluster}}^{\text{nonbonded}} [\{\bar{\mathbf{R}}_C\}] \right) \end{aligned} \quad (\text{S27})$$

$$\begin{aligned} \vec{\nabla}_{\text{atom}_1} \vec{\nabla}_{\text{atom}_2} \Phi_{ABx}^{\text{intercluster}} &= \Theta_H [d_{\text{cutoff}}^{\text{nonbonded}} - d_{AB}] \\ &\left( 2\tau_{AB} [d_{AB}, d_{AB}^{\text{eq},j}] \left( U_{ABx,\text{intercluster}}^{\text{nonbonded}} [\{\bar{\mathbf{R}}_C\}] - U_{ABx,\text{intercluster}}^{\text{nonbonded}} [\{\bar{\mathbf{R}}_C^{\text{eq},j}\}] \right) \vec{\nabla}_{\text{atom}_1} \vec{\nabla}_{\text{atom}_2} \tau_{AB} [d_{AB}, d_{AB}^{\text{eq},j}] \right. \\ &+ \tau_{AB}^2 [d_{AB}, d_{AB}^{\text{eq},j}] \vec{\nabla}_{\text{atom}_1} \vec{\nabla}_{\text{atom}_2} U_{ABx,\text{intercluster}}^{\text{nonbonded}} [\{\bar{\mathbf{R}}_C\}] \\ &+ 2\tau_{AB} [d_{AB}, d_{AB}^{\text{eq},j}] \left( \vec{\nabla}_{\text{atom}_1} U_{ABx,\text{intercluster}}^{\text{nonbonded}} [\{\bar{\mathbf{R}}_C\}] \right) \vec{\nabla}_{\text{atom}_2} \tau_{AB} [d_{AB}, d_{AB}^{\text{eq},j}] \\ &+ 2\tau_{AB} [d_{AB}, d_{AB}^{\text{eq},j}] \left( \vec{\nabla}_{\text{atom}_1} \tau_{AB} [d_{AB}, d_{AB}^{\text{eq},j}] \right) \vec{\nabla}_{\text{atom}_2} U_{ABx,\text{intercluster}}^{\text{nonbonded}} [\{\bar{\mathbf{R}}_C\}] \\ &\left. + 2 \left( U_{ABx,\text{intercluster}}^{\text{nonbonded}} [\{\bar{\mathbf{R}}_C\}] - U_{ABx,\text{intercluster}}^{\text{nonbonded}} [\{\bar{\mathbf{R}}_C^{\text{eq},j}\}] \right) \left( \vec{\nabla}_{\text{atom}_1} \tau_{AB} [d_{AB}, d_{AB}^{\text{eq},j}] \right) \vec{\nabla}_{\text{atom}_2} \tau_{AB} [d_{AB}, d_{AB}^{\text{eq},j}] \right) \end{aligned} \quad (\text{S28})$$

$$\begin{aligned} \vec{\nabla}_{\text{atom}_1} \vec{\nabla}_{\text{atom}_2} \Phi_{ABx}^{\text{intracluster}} &= \Theta_H [d_{\text{cutoff}}^{\text{nonbonded}} - d_{AB}] \\ &\left( 2\tau_{AB} [d_{AB}, d_{AB}^{\text{eq},j}] \left( U_{ABx,\text{intracluster}}^{\text{nonbonded}} [\{\bar{\mathbf{R}}_C\}] - U_{ABx,\text{intracluster}}^{\text{nonbonded}} [\{\bar{\mathbf{R}}_C^{\text{eq},j}\}] \right) \vec{\nabla}_{\text{atom}_1} \vec{\nabla}_{\text{atom}_2} \tau_{AB} [d_{AB}, d_{AB}^{\text{eq},j}] \right. \\ &+ \tau_{AB}^2 [d_{AB}, d_{AB}^{\text{eq},j}] \vec{\nabla}_{\text{atom}_1} \vec{\nabla}_{\text{atom}_2} U_{ABx,\text{intracluster}}^{\text{nonbonded}} [\{\bar{\mathbf{R}}_C\}] \\ &+ 2\tau_{AB} [d_{AB}, d_{AB}^{\text{eq},j}] \left( \vec{\nabla}_{\text{atom}_1} U_{ABx,\text{intracluster}}^{\text{nonbonded}} [\{\bar{\mathbf{R}}_C\}] \right) \vec{\nabla}_{\text{atom}_2} \tau_{AB} [d_{AB}, d_{AB}^{\text{eq},j}] \\ &+ 2\tau_{AB} [d_{AB}, d_{AB}^{\text{eq},j}] \left( \vec{\nabla}_{\text{atom}_1} \tau_{AB} [d_{AB}, d_{AB}^{\text{eq},j}] \right) \vec{\nabla}_{\text{atom}_2} U_{ABx,\text{intracluster}}^{\text{nonbonded}} [\{\bar{\mathbf{R}}_C\}] \\ &\left. + 2 \left( U_{ABx,\text{intracluster}}^{\text{nonbonded}} [\{\bar{\mathbf{R}}_C\}] - U_{ABx,\text{intracluster}}^{\text{nonbonded}} [\{\bar{\mathbf{R}}_C^{\text{eq},j}\}] \right) \left( \vec{\nabla}_{\text{atom}_1} \tau_{AB} [d_{AB}, d_{AB}^{\text{eq},j}] \right) \vec{\nabla}_{\text{atom}_2} \tau_{AB} [d_{AB}, d_{AB}^{\text{eq},j}] \right) \end{aligned} \quad (\text{S29})$$

*Case # 3:* The two atoms A and D are not inside the same bonded cluster and a cutoff distance is used for their nonbonded interaction. In this case, we express the effective multibody pairwise potentials as follows:

$$\Phi_{ADx}^{\text{intercluster}} = \Theta_H \left[ d_{\text{cutoff}}^{\text{nonbonded}} - d_{AB} \right] \tau_{AB}^3 \left[ d_{AB}, d_{\text{cutoff}}^{\text{nonbonded}} \right] U_{ABx, \text{intercluster}}^{\text{nonbonded}} \left[ \left\{ \vec{R}_C \right\} \right] \quad (\text{S30})$$

$$\Phi_{ADx}^{\text{intracluster}} = 0 \quad (\text{S31})$$

The first-order and second-order derivatives expand as follows:

$$\vec{\nabla}_{\text{atom}_1} \Phi_{ABx}^{\text{intercluster}} = \Theta_H \left[ d_{\text{cutoff}}^{\text{nonbonded}} - d_{AB} \right] \left( 3\tau_{AB}^2 \left[ d_{AB}, d_{\text{cutoff}}^{\text{nonbonded}} \right] \left( U_{ABx, \text{intercluster}}^{\text{nonbonded}} \left[ \left\{ \vec{R}_C \right\} \right] - U_{ABx, \text{intercluster}}^{\text{nonbonded}} \left[ \left\{ \vec{R}_C^{\text{eq-j}} \right\} \right] \right) \vec{\nabla}_{\text{atom}_1} \tau_{AB} \left[ d_{AB}, d_{\text{cutoff}}^{\text{nonbonded}} \right] + \tau_{AB}^3 \left[ d_{AB}, d_{\text{cutoff}}^{\text{nonbonded}} \right] \vec{\nabla}_{\text{atom}_1} U_{ABx, \text{intercluster}}^{\text{nonbonded}} \left[ \left\{ \vec{R}_C \right\} \right] \right) \quad (\text{S32})$$

$$\vec{\nabla}_{\text{atom}_1} \Phi_{ABx}^{\text{intracluster}} = 0 \quad (\text{S33})$$

$$\vec{\nabla}_{\text{atom}_1} \vec{\nabla}_{\text{atom}_2} \Phi_{ABx}^{\text{intercluster}} = \Theta_H \left[ d_{\text{cutoff}}^{\text{nonbonded}} - d_{AB} \right] \left( 3\tau_{AB}^2 \left[ d_{AB}, d_{\text{cutoff}}^{\text{nonbonded}} \right] \left( U_{ABx, \text{intercluster}}^{\text{nonbonded}} \left[ \left\{ \vec{R}_C \right\} \right] - U_{ABx, \text{intercluster}}^{\text{nonbonded}} \left[ \left\{ \vec{R}_C^{\text{eq-j}} \right\} \right] \right) \vec{\nabla}_{\text{atom}_1} \vec{\nabla}_{\text{atom}_2} \tau_{AB} \left[ d_{AB}, d_{\text{cutoff}}^{\text{nonbonded}} \right] + \tau_{AB}^3 \left[ d_{AB}, d_{\text{cutoff}}^{\text{nonbonded}} \right] \vec{\nabla}_{\text{atom}_1} \vec{\nabla}_{\text{atom}_2} U_{ABx, \text{intercluster}}^{\text{nonbonded}} \left[ \left\{ \vec{R}_C \right\} \right] + 3\tau_{AB}^2 \left[ d_{AB}, d_{\text{cutoff}}^{\text{nonbonded}} \right] \left( \vec{\nabla}_{\text{atom}_1} U_{ABx, \text{intercluster}}^{\text{nonbonded}} \left[ \left\{ \vec{R}_C \right\} \right] \right) \vec{\nabla}_{\text{atom}_2} \tau_{AB} \left[ d_{AB}, d_{\text{cutoff}}^{\text{nonbonded}} \right] + 3\tau_{AB}^2 \left[ d_{AB}, d_{\text{cutoff}}^{\text{nonbonded}} \right] \left( \vec{\nabla}_{\text{atom}_1} \tau_{AB} \left[ d_{AB}, d_{\text{cutoff}}^{\text{nonbonded}} \right] \right) \vec{\nabla}_{\text{atom}_2} U_{ABx, \text{intercluster}}^{\text{nonbonded}} \left[ \left\{ \vec{R}_C \right\} \right] + 6\tau_{AB} \left[ d_{AB}, d_{\text{cutoff}}^{\text{nonbonded}} \right] \left( U_{ABx, \text{intercluster}}^{\text{nonbonded}} \left[ \left\{ \vec{R}_C \right\} \right] - U_{ABx, \text{intercluster}}^{\text{nonbonded}} \left[ \left\{ \vec{R}_C^{\text{eq-j}} \right\} \right] \right) \left( \vec{\nabla}_{\text{atom}_1} \tau_{AB} \left[ d_{AB}, d_{\text{cutoff}}^{\text{nonbonded}} \right] \right) \vec{\nabla}_{\text{atom}_2} \tau_{AB} \left[ d_{AB}, d_{\text{cutoff}}^{\text{nonbonded}} \right] \right) \quad (\text{S34})$$

$$\vec{\nabla}_{\text{atom}_1} \vec{\nabla}_{\text{atom}_2} \Phi_{ADx}^{\text{intracluster}} = 0 \quad (\text{S35})$$

*Case # 4:* The two atoms A and D are not inside the same bonded cluster and a cutoff distance is not used for their nonbonded interaction. In this case, we express the effective multibody pairwise potentials as follows:

$$\Phi_{ADx}^{\text{intercluster}} = U_{ABx, \text{intercluster}}^{\text{nonbonded}} \left[ \left\{ \vec{R}_C \right\} \right] \quad (\text{S36})$$

$$\Phi_{ADx}^{\text{intracluster}} = 0 \quad (\text{S37})$$

The first-order and second-order derivatives expand as follows:

$$\vec{\nabla}_{\text{atom}_1} \Phi_{ABx}^{\text{intercluster}} = \vec{\nabla}_{\text{atom}_1} U_{ABx, \text{intercluster}}^{\text{nonbonded}} \left[ \left\{ \vec{R}_C \right\} \right] \quad (\text{S38})$$

$$\vec{\nabla}_{\text{atom}_1} \Phi_{ADx}^{\text{intracluster}} = 0 \quad (\text{S39})$$

$$\vec{\nabla}_{\text{atom}_1} \vec{\nabla}_{\text{atom}_2} \Phi_{ABx}^{\text{intercluster}} = \vec{\nabla}_{\text{atom}_1} \vec{\nabla}_{\text{atom}_2} U_{ABx, \text{intercluster}}^{\text{nonbonded}} \left[ \left\{ \vec{R}_C \right\} \right] \quad (\text{S40})$$

$$\vec{\nabla}_{\text{atom}_1} \vec{\nabla}_{\text{atom}_2} \Phi_{ADx}^{\text{intracluster}} = 0 \quad (\text{S41})$$



### S3. Analytic derivatives of the Manz stretch potential

$$U_{AB}^{\text{Manz\_stretch}}[d_{AB}] = \frac{3k_{AB}}{5\gamma_{AB}^{\circ 2}} \left( 1 - \left( \frac{5}{2} \right) \exp[-\gamma_{AB}^{\circ} (d_{AB} - d_{AB}^{\text{ref}})] + \left( \frac{3}{2} \right) \exp\left[-\frac{5}{3}\gamma_{AB}^{\circ} (d_{AB} - d_{AB}^{\text{ref}})\right] \right) \quad (\text{S42})$$

$$\frac{dU_{AB}^{\text{Manz\_stretch}}[d_{AB}]}{dd_{AB}} = \frac{3k_{AB}}{2\gamma_{AB}^{\circ}} \left( \exp[-\gamma_{AB}^{\circ} (d_{AB} - d_{AB}^{\text{ref}})] - \exp\left[-\frac{5}{3}\gamma_{AB}^{\circ} (d_{AB} - d_{AB}^{\text{ref}})\right] \right) \quad (\text{S43})$$

$$\frac{d^2U_{AB}^{\text{Manz\_stretch}}[d_{AB}]}{dd_{AB}^2} = k_{AB} \left( -\frac{3}{2} \exp[-\gamma_{AB}^{\circ} (d_{AB} - d_{AB}^{\text{ref}})] + \frac{5}{2} \exp\left[-\frac{5}{3}\gamma_{AB}^{\circ} (d_{AB} - d_{AB}^{\text{ref}})\right] \right) \quad (\text{S44})$$

$$\frac{d^3U_{AB}^{\text{Manz\_stretch}}[d_{AB}]}{dd_{AB}^3} = k_{AB}\gamma_{AB}^{\circ} \left( \frac{3}{2} \exp[-\gamma_{AB}^{\circ} (d_{AB} - d_{AB}^{\text{ref}})] - \frac{25}{6} \exp\left[-\frac{5}{3}\gamma_{AB}^{\circ} (d_{AB} - d_{AB}^{\text{ref}})\right] \right) \quad (\text{S45})$$

$$\frac{d^4U_{AB}^{\text{Manz\_stretch}}[d_{AB}]}{dd_{AB}^4} = k_{AB}\gamma_{AB}^{\circ 2} \left( -\frac{3}{2} \exp[-\gamma_{AB}^{\circ} (d_{AB} - d_{AB}^{\text{ref}})] + \frac{125}{18} \exp\left[-\frac{5}{3}\gamma_{AB}^{\circ} (d_{AB} - d_{AB}^{\text{ref}})\right] \right) \quad (\text{S46})$$

### S4. Analytic derivatives of my new angle-bending potential

Consider a bond angle defined by the atoms A, B, and C, where B is the middle atom. Swope and Ferguson<sup>S1</sup> and Dubbeldam et al.<sup>S2</sup> gave universal formulas for first and second derivatives of any angle-bending potential  $U_{\angle}[\theta]$  with respect to changes in the Cartesian coordinates of atoms A, B, C. Dubbeldam et al.<sup>S2</sup> also gave universal formulas for first and second derivatives of any angle-bending potential with respect to changes in the unit cell's size and shape for unrelaxed homogeneous strain. Their formulas require the following inputs:

$$f_1 = \frac{dU_{\angle}[\theta]}{d\cos[\theta]} \quad (\text{S47})$$

$$f_2 = \frac{d^2U_{\angle}[\theta]}{(d\cos[\theta])^2} \quad (\text{S48})$$

For conciseness, we first define

$$U_{\text{new}}[\theta] = k \frac{2(\cos\theta - \cos\theta_{\text{eq}})^2}{\sin^2\theta + 3\sin^2\theta_{\text{eq}} \left( \frac{\tanh[2\sin[\theta/2]]}{\tanh[2\sin[\theta_{\text{eq}}/2]]} \right)} = k \frac{2(\cos\theta - \cos\theta_{\text{eq}})^2}{w[\theta]} \quad (\text{S49})$$

$$p[\theta] = \sqrt{2(1 - \cos\theta)} = 2\sin[\theta/2] \quad (\text{S50})$$

$$\text{tp}[\theta] = \tanh[p[\theta]] \quad (\text{S51})$$

$$w[\theta] = 1 - \cos^2\theta + 3(1 - \cos^2\theta_{\text{eq}}) \left( \frac{\text{tp}[\theta]}{\text{tp}[\theta_{\text{eq}}]} \right) \quad (\text{S52})$$

Its derivatives are

$$\mu[\theta] = -3 \left( \frac{1 - \cos^2\theta_{\text{eq}}}{p[\theta]} \right) \left( \frac{1 - (\text{tp}[\theta])^2}{\text{tp}[\theta_{\text{eq}}]} \right) \quad (\text{S53})$$

$$\frac{dw[\theta]}{d\cos[\theta]} = -2\cos\theta + \mu[\theta] \quad (\text{S54})$$

$$\frac{d^2w[\theta]}{(d\cos[\theta])^2} = -2 + \frac{\mu[\theta]}{p[\theta]} \left( 2tp[\theta] + \frac{1}{(p[\theta])^2} \right) \quad (\text{S55})$$

The derivatives of my new angle-bending function are:

$$\frac{dU_{\text{new}}[\theta]}{d\cos[\theta]} = \frac{1}{w[\theta, \theta_{\text{eq}}]} \left( 4k(\cos\theta - \cos\theta_{\text{eq}}) - U_{\text{new}}[\theta] \frac{dw[\theta]}{d\cos[\theta]} \right) \quad (\text{S56})$$

$$\frac{d^2U_{\text{new}}[\theta]}{(d\cos[\theta])^2} = \frac{1}{w[\theta, \theta_{\text{eq}}]} \left( 4k - 2 \frac{dU_{\text{new}}[\theta]}{d\cos[\theta]} \frac{dw[\theta]}{d\cos[\theta]} - U_{\text{new}}[\theta] \frac{d^2w[\theta]}{(d\cos[\theta])^2} \right) \quad (\text{S57})$$

Eqn (S54)–(S57) were derived by substituting  $t = \cos[\theta]$  into eqn (S49) or (S52) and then differentiating with respect to  $t$ . Eqn (S56) and (S57) can be used to compute the potential's derivatives with respect to bond angle changes:

$$\frac{dU_{\text{new}}[\theta]}{d\theta} = -\sin[\theta] \frac{dU_{\text{new}}[\theta]}{d\cos[\theta]} \quad (\text{S58})$$

$$\frac{d^2U_{\text{new}}[\theta]}{d\theta^2} = -\cos[\theta] \frac{dU_{\text{new}}[\theta]}{d\cos[\theta]} + \sin^2[\theta] \frac{d^2U_{\text{new}}[\theta]}{(d\cos[\theta])^2} \quad (\text{S59})$$

If  $\theta = \theta_{\text{eq}} = \pi$ , then the following formulas should be used to avoid division by zero:

$$U_{\text{new}}[\theta = \theta_{\text{eq}} = \pi] = 0 \quad (\text{S60})$$

$$\left. \frac{dU_{\text{new}}}{d\cos[\theta]} \right|_{\theta=\theta_{\text{eq}}=\pi} = k \quad (\text{S61})$$

$$\left. \frac{d^2U_{\text{new}}}{(d\cos[\theta])^2} \right|_{\theta=\theta_{\text{eq}}=\pi} = 0 \quad (\text{S62})$$

$$\left. \frac{dU_{\text{new}}}{d\theta} \right|_{\theta=\theta_{\text{eq}}=\pi} = -k \sin[\theta] \quad (\text{S63})$$

$$\left. \frac{d^2U_{\text{new}}}{d\theta^2} \right|_{\theta=\theta_{\text{eq}}=\pi} = -k \cos[\theta] \quad (\text{S64})$$

## References

- S1. W. C. Swope and D. M. Ferguson, Alternative expressions for energies and forces due to angle bending and torsional energy, *J. Comput. Chem.*, 1992, **13**, 585-594, DOI: 10.1002/jcc.540130508.
- S2. D. Dubbeldam, K. S. Walton, T. J. H. Vlugt and S. Calero, Design, parameterization, and implementation of atomic force fields for adsorption in nanoporous materials, *Adv. Theory Simul.*, 2019, **2**, 1900135, DOI: 10.1002/adts.201900135.
